# Supplementary material for: Long-term safety of once-daily, dual-release hydrocortisone in patients with adrenal insufficiency: a phase 3b, open-label, extension study
Source: PubMed Central journal article supplement (PMC5425941; doi:10.1530/eje-17-0067), 2017-03-14
Supplement: eje-176-715-s001.pdf [file eje-176-715-s001.pdf]

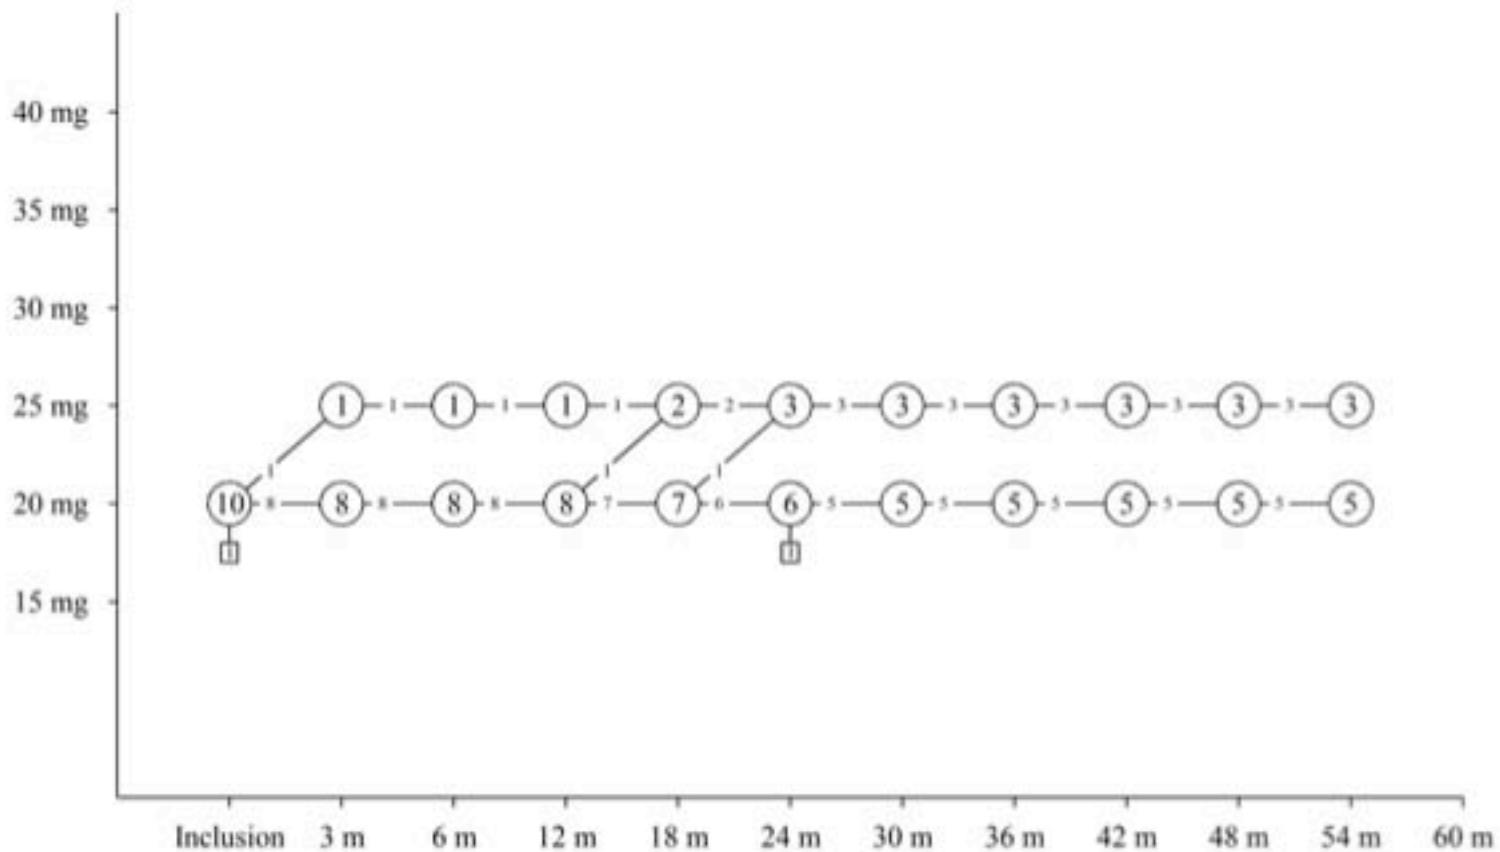

Numbers in circles are number of patients on a certain Plenadren dose (dispensation) at the visit  
 Numbers on lines describes the number of patients that moves from/stays on one dose to another between visits  
 Numbers in squares are the number of patients that drops out on a certain dose and visit
